# Supplementary material for: Biological and mechanical interplay at the Macro- and Microscales Modulates the Cell-Niche Fate
Source: PubMed Central journal article supplement (PMC5834609; doi:10.1038/s41598-018-21860-6), 2018-03-02
Supplement: 41598_2018_21860_MOESM1_ESM.pdf [file 41598_2018_21860_MOESM1_ESM.pdf]

# Biological and mechanical interplay at the Macro- and Microscales Modulates the Cell-Niche Fate

Udi Sarig<sup>1</sup>, Hadar Sarig<sup>1</sup>, Aleksander Gora<sup>2</sup>, Muthu Kumar Krishnamoorthi<sup>1</sup>, Gigi Chi Ting Au-Yeung<sup>1</sup>, Elio de Berardinis<sup>1</sup>, Su Yin Chaw<sup>1</sup>, Priyadarshini Mhaisalkar<sup>1</sup>, Hanumakumar Bogireddi<sup>1</sup>, Seeram Ramakrishna<sup>2</sup>, Freddy Yin Chiang Boey<sup>1</sup>, Subbu S. Venkatraman<sup>1</sup>, Marcelle Machluf<sup>2,3,\*</sup>

<sup>1</sup> School of Materials and Science Engineering (MSE), Nanyang Technological University (NTU), Singapore

<sup>2</sup> Department of Mechanical Engineering, National University of Singapore (NUS), Singapore

<sup>3</sup> Faculty of Biotechnology and Food Engineering, Technion—Israel Institute of Technology (IIT), Haifa, Israel

\* Corresponding author:

Marcelle Machluf (PhD), Dean – Faculty of Biotechnology and Food Engineering | Benno Gitter and iLana Ben Ami Chair in Biotechnology | President, Israel Chapter of the Controlled Release Society | Head of the Laboratory for Cancer Drug Delivery & Cell Based Technologies. Technion—Israel Institute of Technology. Haifa, Israel Tel: +972-4-829-3068/9 website: <http://drugcelltherapy.net.technion.ac.il/> | E-mail: [machlufm@tx.technion.ac.il](mailto:machlufm@tx.technion.ac.il)

## Detailed statistical analyses for bi-modal distribution function fitting

Distribution function fittings, for each peak individually, were ranked using the Akaike information criterion (AIC),  $\chi^2$  goodness of fit and adjusted R<sup>2</sup> values (OriginPro 2015 16bit Sr2 b9.2.272, OriginLab Corp., Northampton, MA). Successful fit was considered as having the minimal AIC value with a  $\chi^2 < 0.05$  and adjusted R<sup>2</sup> > 0.95. Among all models tested, the exponentially modified Gauss model (GaussMod) was found to provide the optimal fit for all samples and was, therefore, used for subsequent data analyses and interpretation. The GaussMod function is given by the following function (Eq. 1):

$$\text{Eq. 1.} \quad f(x) = y_0 + \frac{A}{t_0} e^{\frac{1}{2} \left( \frac{w}{t_0} \right)^2 - \frac{x-x_c}{t_0}} \int_{-\infty}^z \frac{1}{\sqrt{2\pi}} e^{-\frac{y^2}{2}} dy,$$

whereas ‘Y<sub>0</sub>’ is the function offset value, ‘A’ represents the area under the curve. ‘x<sub>c</sub>’ is equivalent to the distribution center, ‘w’ is the distribution width and both ‘x<sub>c</sub>’ and ‘w’ as well as t<sub>0</sub> are determined by the following relationships of z, distribution mean ‘ $\bar{x}$ ’ and its standard deviation (‘SD’) in Eq. 2, Eq. 3, and Eq. 4, respectively:

$$\text{Eq. 2.} \quad z = \frac{x-x_c}{w} - \frac{w}{t_0}$$

$$\text{Eq. 3.} \quad \bar{x} = x_c + t_0$$

$$\text{Eq. 4.} \quad SD^2 = w^2 + t_0^2$$

Given the bi-modal distributions, descriptive statistics are provided for each peak individually, as well as additional non-conventional descriptive statistics that we developed and found to best describe the relationships between the two peaks ( $P_1$  and  $P_2$ , which obey  $\bar{x}_{P_1} < \bar{x}_{P_2}$ ). The non-conventional descriptive statistics, developed for the quantification of the inter-peak relations, are the ‘Relative Contribution Ratio’ (RCR, Eq. 5), ‘Mechanical Mismatch Ratio’ (MMR, Eq. 6) and ‘Integration Ratio’ (IR, Eq. 7):

$$\text{Eq. 5.} \quad RCR = \frac{A_{P_1}}{A_{P_2}}$$

$$\text{Eq. 6.} \quad MMR = \frac{\bar{x}_{P_2}}{\bar{x}_{P_1}}$$

$$\text{Eq. 7.} \quad IR = \frac{\bar{x}_{P_2} - \bar{x}_{P_1}}{SD_{P_1} + SD_{P_2}}$$

These three parameters represent the relationship between the first red peak, which is attributed to the major cell contribution (as discussed in text), and the second blue peak attributed to the major pcECM mechanical contribution.

**Supplementary Fig. S1. AFM set-up for microscopic mechanical evaluation of the pcECM, recellularized and native tissue.** A scheme of the wet AFM set-up (**a**), where a polystyrene bead was attached to the cantilever for measurement of Young’s moduli using the Hertz model (**a**, **inset**). Correct bead attachment was verified by SEM imaging (**b**). Force spectroscopy mapping of Young’s moduli (n=4-5 samples per group) was performed on at least seven randomly selected regions of interest (ROI) per sample (black squares for size illustration purposes in **c** and **d**), and three measurement repetitions in each ROI. Care was taken in the random choice of ROI covering all representative structures and morphologies. For example, apparent differences in collagen (**c**, arrows point to high density collagen in representative pcECM sample) and cellular (**d**, arrows point to high density cells marked by reduced AlamarBlue in pink) densities. Each ROI ( $100\mu\text{m}^2$ ) was divided by a grid of 256 spatial contact points, for each of which, the tip-sample attraction and repulsion forces as a function of tip-sample distance were recorded. The Young’s modulus values determined for each measurement were averaged for each contact point resulting in a color heat map of average moduli for each ROI (**e**). Representative output from an individual point of contact force-distance curve showing approach (red line), retraction (blue line) and the fitted Hertz model (green) from which the Young’s moduli value is determined (at the intersection of the horizontal and vertical dashed lines, **f**).

Supplementary Fig. S1

Sarig et al., 2017

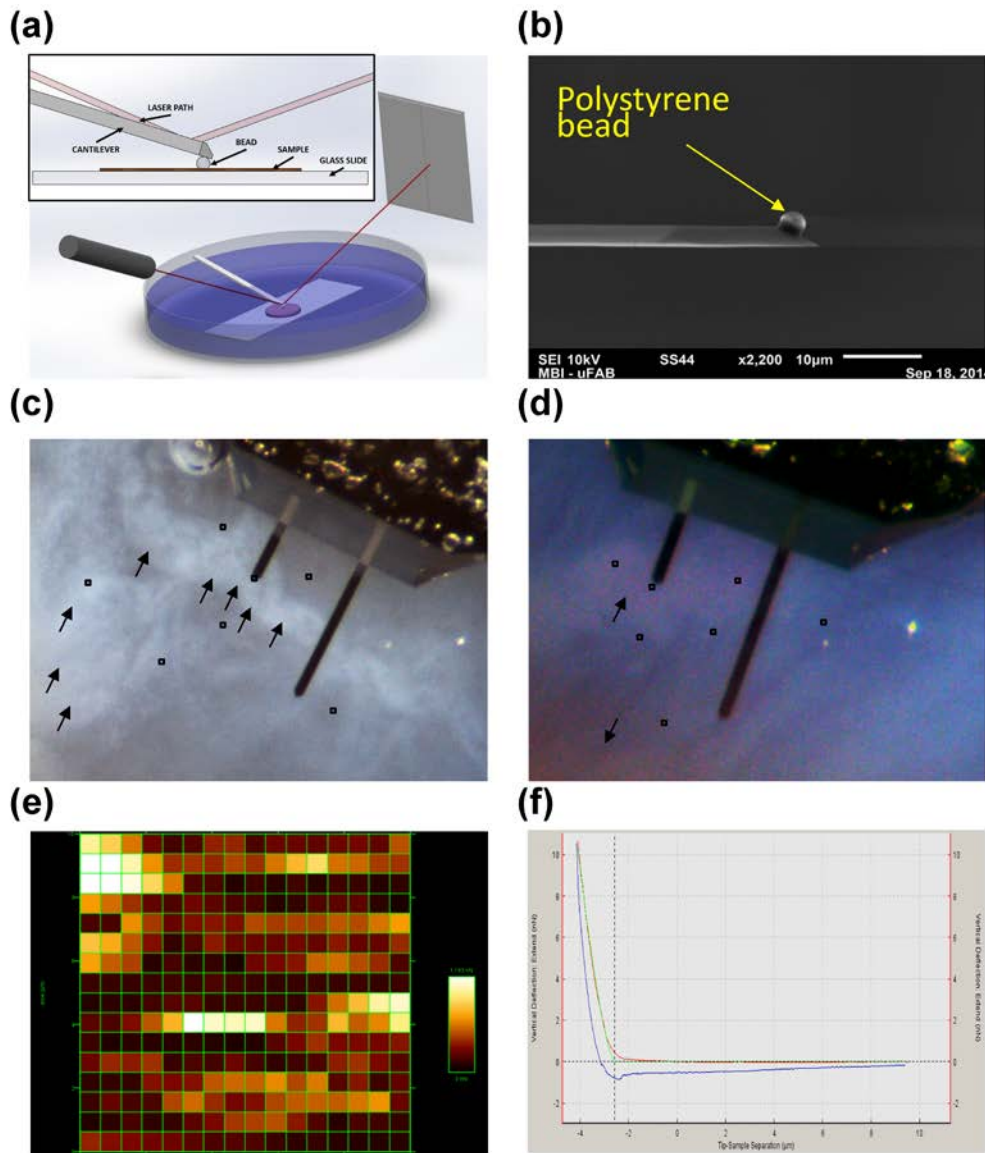

## Supplementary Tables

Supplementary Table S1: Statistical analyses of differential gene expression in double normalized hMSCs vs. HUVECs comparison (correlating to Fig. 7a)

| Gene name*     | Fold change             | Log <sub>2</sub> (Fold Change) | p-value**          |
|----------------|-------------------------|--------------------------------|--------------------|
| <u>CTNND2</u>  | <u>38700299414913.6</u> | <u>45.13741</u>                | <u>0.00000001</u>  |
| <u>VCAN</u>    | <u>8723.35065</u>       | <u>13.09067</u>                | <u>0.000151449</u> |
| <u>TGFBI</u>   | <u>1881.06415</u>       | <u>10.87733</u>                | <u>0.000001281</u> |
| <u>THBS2</u>   | <u>1574.48759</u>       | <u>10.62067</u>                | <u>0.000002051</u> |
| <u>COL11A1</u> | <u>1488.40926</u>       | <u>10.53956</u>                | <u>0.00000236</u>  |
| <u>MMP3</u>    | <u>502.85547</u>        | <u>8.974</u>                   | <u>0.000164446</u> |
| <u>SPP1</u>    | <u>364.97456</u>        | <u>8.51165</u>                 | <u>0.000004573</u> |
| <u>COL7A1</u>  | <u>346.64937</u>        | <u>8.43733</u>                 | <u>0.00000037</u>  |
| <u>COL1A1</u>  | <u>273.23529</u>        | <u>8.094</u>                   | <u>0.000000511</u> |
| <u>TNC</u>     | <u>220.05218</u>        | <u>7.7817</u>                  | <u>0.00001276</u>  |
| <u>COL12A1</u> | <u>189.66811</u>        | <u>7.56733</u>                 | <u>0.000009232</u> |
| <u>COL6A2</u>  | <u>154.41474</u>        | <u>7.27067</u>                 | <u>0.000001705</u> |
| <u>MMP8</u>    | <u>149.15481</u>        | <u>7.22067</u>                 | <u>0.000318693</u> |
| <u>TIMP3</u>   | <u>144.74135</u>        | <u>7.17733</u>                 | <u>0.00003679</u>  |
| <u>TIMP1</u>   | <u>126.58828</u>        | <u>6.984</u>                   | <u>0.000000647</u> |
| <u>ITGA4</u>   | <u>111.48198</u>        | <u>6.80067</u>                 | <u>0.000101871</u> |
| <u>CD44</u>    | <u>77.92423</u>         | <u>6.284</u>                   | <u>0.000003091</u> |
| <u>ITGB2</u>   | <u>44.45097</u>         | <u>5.47414</u>                 | <u>0.000008832</u> |
| <u>COL16A1</u> | <u>43.1314</u>          | <u>5.43067</u>                 | <u>0.000035588</u> |
| <u>ITGA1</u>   | <u>36.60579</u>         | <u>5.194</u>                   | <u>0.000034561</u> |
| <u>HAS1</u>    | <u>31.72027</u>         | <u>4.98733</u>                 | <u>0.000051086</u> |
| <u>MMP13</u>   | <u>20.75321</u>         | <u>4.37526</u>                 | <u>0.000061694</u> |
| <u>COL6A1</u>  | <u>20.73506</u>         | <u>4.374</u>                   | <u>0.000019477</u> |
| <u>MMP12</u>   | <u>20.6872</u>          | <u>4.37067</u>                 | <u>0.000088511</u> |
| <u>ECM1</u>    | <u>12.67576</u>         | <u>3.664</u>                   | <u>0.000126353</u> |
| <u>ITGB5</u>   | <u>10.15417</u>         | <u>3.344</u>                   | <u>0.000445663</u> |
| <u>COL5A1</u>  | <u>7.13048</u>          | <u>2.834</u>                   | <u>0.000037777</u> |
| ITGA2          | 4.19111                 | 2.06733                        | 0.000024221        |
| LAMA2          | 4.14297                 | 2.05067                        | 0.000213475        |
| ICAM1          | 3.64016                 | 1.864                          | 0.000263945        |
| MMP2           | 3.40424                 | 1.76733                        | 0.00002895         |
| SPARC          | 2.36854                 | 1.244                          | 0.000160787        |
| ITGA3          | 2.06194                 | 1.044                          | 0.00021634         |
| CTNND1         | -2.40494                | -1.266                         | 0.000040458        |
| <u>MMP15</u>   | <u>-6.92909</u>         | <u>-2.79267</u>                | <u>0.000022807</u> |
| <u>ITGA6</u>   | <u>-12.78163</u>        | <u>-3.676</u>                  | <u>0.000033297</u> |
| <u>PECAM1</u>  | <u>-566.52664</u>       | <u>-9.146</u>                  | <u>0.000016564</u> |
| LAMA1          | 77.38596                | 6.274                          | 0.000652824        |
| VTN            | 38.96211                | 5.284                          | 0.000791812        |
| ANOS1          | 23.76336                | 4.57067                        | 0.000836877        |
| COL15A1        | 18.81746                | 4.234                          | 0.006306298        |
| ITGA7          | 11.26675                | 3.494                          | 0.003276084        |
| NCAM1          | 7.5422                  | 2.91499                        | 0.000849779        |
| LAMA3          | 7.3649                  | 2.88067                        | 0.003539955        |

Table 1 - continued

| Gene name | Fold change | Log <sub>2</sub> (Fold Change) | p-value     |
|-----------|-------------|--------------------------------|-------------|
| MMP9      | 5.71202     | 2.514                          | 0.037189645 |
| COL14A1   | 3.94675     | 1.98067                        | 0.008667999 |
| ITGB1     | 3.20576     | 1.68067                        | 0.001845391 |
| ITGB3     | 3.15433     | 1.65733                        | 0.002117766 |
| MMP14     | 2.84942     | 1.51067                        | 0.001870946 |
| ADAMTS13  | 2.56804     | 1.36067                        | 0.0078456   |
| FN1       | 2.25636     | 1.174                          | 0.027465057 |
| TIMP2     | 1.56266     | 0.644                          | 0.006546757 |
| COL4A2    | 1.50594     | 0.59067                        | 0.006968409 |
| SGCE      | 1.40834     | 0.494                          | 0.034494224 |
| ITGA5     | 1.17338     | 0.23067                        | 0.002394059 |
| CTNNA1    | -1.37809    | -0.46267                       | 0.019288085 |
| MMP16     | -1.65023    | -0.72267                       | 0.026126235 |
| CTNNA1    | -1.65787    | -0.72933                       | 0.006923804 |
| MMP11     | -1.69271    | -0.75933                       | 0.018313669 |
| CLEC3B    | -2.6378     | -1.39933                       | 0.006869969 |
| VCAM1     | -3.47256    | -1.796                         | 0.001724097 |
| MMP1      | -5.08413    | -2.346                         | 0.002241524 |
| THBS1     | -6.00432    | -2.586                         | 0.013501825 |
| CTGF      | -9.73153    | -3.28267                       | 0.009803995 |
| ITGB4     | -16.44222   | -4.03933                       | 0.001125976 |
| SELP      | -45.12953   | -5.496                         | 0.001903307 |
| SELL      | -383.38941  | -8.58267                       | 0.000847255 |
| CDH1      | 44.48868    | 5.47537                        | 0.160321143 |
| SELE      | 14.22333    | 3.83019                        | 0.781266756 |
| ITGAM     | 8.28595     | 3.05067                        | 0.338307823 |
| ITGAL     | 4.79213     | 2.26067                        | 0.243873576 |
| CNTN1     | 3.67112     | 1.87622                        | 0.201374738 |
| ADAMTS8   | 3.52429     | 1.81733                        | 0.589584753 |
| THBS3     | 1.38255     | 0.46733                        | 0.057771668 |
| COL8A1    | 1.26342     | 0.33733                        | 0.402021918 |
| LAMB1     | 1.13603     | 0.184                          | 0.224500069 |
| ITGAV     | 1.09987     | 0.13733                        | 0.618610772 |
| LAMC1     | 1.07475     | 0.104                          | 0.338719686 |
| MMP10     | -1.09885    | -0.136                         | 0.824188373 |
| SPG7      | -1.26225    | -0.336                         | 0.11007453  |
| ADAMTS1   | -1.3941     | -0.47933                       | 0.648121963 |
| ITGA8     | -1.84378    | -0.88267                       | 0.234622281 |
| LAMB3     | -2.71823    | -1.44267                       | 0.0813559   |
| MMP7      | -5.16702    | -2.36933                       | 0.05605597  |

(\*) Bold and underlined data entries represent genes that were both significantly up or down regulated (as indicated by their sign) and over 5-fold regulation in either direction, and were therefore used for the GeneAnalytics analyses. (\*\*) Green color represents statistically significant changes, yellow—nonsignificant changes based on Tukey's post hoc correction, but still of  $p < 0.05$ . Pink— nonsignificant changes ( $p > 0.05$  per individual t-test).

**Supplementary Table S2: Statistical analyses of differential gene expression in double normalized coculture vs. hMSCs comparison (correlating to Fig. 7b)**

| Gene name*            | Fold change                     | Log <sub>2</sub> (Fold Change) | p-value**                 |
|-----------------------|---------------------------------|--------------------------------|---------------------------|
| <b><u>PECAM1</u></b>  | <b><u>477.49219</u></b>         | <b><u>8.89933</u></b>          | <b><u>0.000024858</u></b> |
| <b><u>TNC</u></b>     | <b><u>5.5764</u></b>            | <b><u>2.47933</u></b>          | <b><u>0.000463675</u></b> |
| ITGA5                 | 1.88252                         | 0.91267                        | 0.000066889               |
| VCAM1                 | -1.90176                        | -0.92733                       | 0.000037808               |
| SGCE                  | -1.90176                        | -0.92733                       | 0.000407157               |
| ITGB1                 | -1.99631                        | -0.99733                       | 0.00011262                |
| MMP10                 | -2.0195                         | -1.014                         | 0.000429413               |
| TGFBI                 | -3.08228                        | -1.624                         | 0.000559934               |
| COL5A1                | -3.19836                        | -1.67733                       | 0.000493377               |
| TIMP1                 | -3.35737                        | -1.74733                       | 0.000022312               |
| THBS2                 | -4.57572                        | -2.194                         | 0.000538248               |
| ITGA2                 | -4.74804                        | -2.24733                       | 0.000069955               |
| <b><u>VCAN</u></b>    | <b><u>-6.8717</u></b>           | <b><u>-2.78067</u></b>         | <b><u>0.000095878</u></b> |
| <b><u>ITGA4</u></b>   | <b><u>-10.17766</u></b>         | <b><u>-3.34733</u></b>         | <b><u>0.000217823</u></b> |
| <b><u>VTN</u></b>     | <b><u>-15.31988</u></b>         | <b><u>-3.93733</u></b>         | <b><u>0.000491769</u></b> |
| <b><u>ITGA1</u></b>   | <b><u>-17.8024</u></b>          | <b><u>-4.154</u></b>           | <b><u>0.00001921</u></b>  |
| <b><u>COL12A1</u></b> | <b><u>-26.24553</u></b>         | <b><u>-4.714</u></b>           | <b><u>0.000034715</u></b> |
| <b><u>COL11A1</u></b> | <b><u>-561.83395</u></b>        | <b><u>-9.134</u></b>           | <b><u>0.000504913</u></b> |
| <b><u>CTNND2</u></b>  | <b><u>-1571801264845.68</u></b> | <b><u>-40.51556</u></b>        | <b><u>0.000085494</u></b> |
| SELL                  | 16.59488                        | 4.05267                        | 0.018142394               |
| MMP7                  | 14.58082                        | 3.866                          | 0.013007305               |
| MMP15                 | 7.81367                         | 2.966                          | 0.001718124               |
| MMP13                 | 7.40928                         | 2.88933                        | 0.007862843               |
| MMP11                 | 6.04608                         | 2.596                          | 0.010902245               |
| ITGA6                 | 5.17898                         | 2.37267                        | 0.002422735               |
| NCAM1                 | 2.76255                         | 1.466                          | 0.011880467               |
| ITGA7                 | 2.67462                         | 1.41933                        | 0.013962295               |
| MMP14                 | 2.48975                         | 1.316                          | 0.001171851               |
| MMP1                  | 1.967                           | 0.976                          | 0.0073958                 |
| ADAMTS1               | 1.93545                         | 0.95267                        | 0.037854623               |
| COL6A2                | 1.86952                         | 0.90267                        | 0.019690844               |
| CTNNB1                | 1.8609                          | 0.896                          | 0.001385541               |
| COL6A1                | 1.77686                         | 0.82933                        | 0.04223305                |
| THBS1                 | 1.56844                         | 0.64933                        | 0.012660499               |
| CTNND1                | 1.52203                         | 0.606                          | 0.020942513               |
| LAMB1                 | 1.41683                         | 0.50267                        | 0.040428358               |
| FN1                   | 1.35598                         | 0.43933                        | 0.011218002               |
| CTNNA1                | 1.20804                         | 0.27267                        | 0.037872594               |
| ITGAV                 | -1.499                          | -0.584                         | 0.0055922                 |
| MMP16                 | -1.55905                        | -0.64067                       | 0.006392067               |
| COL4A2                | -1.87125                        | -0.904                         | 0.003581326               |
| ECM1                  | -2.22016                        | -1.15067                       | 0.005284869               |
| COL7A1                | -2.42391                        | -1.27733                       | 0.004195856               |
| COL16A1               | -3.24301                        | -1.69733                       | 0.000881218               |

Table 2 - continued

| Gene name | Fold change | Log <sub>2</sub> (Fold Change) | p-value     |
|-----------|-------------|--------------------------------|-------------|
| SPARC     | -5.20777    | -2.38067                       | 0.000908794 |
| ICAM1     | -5.39143    | -2.43067                       | 0.001923286 |
| COL8A1    | -6.57656    | -2.71733                       | 0.003634194 |
| TIMP3     | -7.85712    | -2.974                         | 0.001642081 |
| MMP12     | -9.83097    | -3.29733                       | 0.027366059 |
| ANOS1     | -14.83226   | -3.89067                       | 0.000814431 |
| ITGAL     | -72.37068   | -6.17733                       | 0.007055734 |
| ADAMTS8   | 25.92011    | 4.696                          | 0.290324226 |
| MMP9      | 5.82665     | 2.54267                        | 0.220841728 |
| ITGA8     | 4.51899     | 2.176                          | 0.069069143 |
| SPP1      | 1.88688     | 0.916                          | 0.208755193 |
| LAMA3     | 1.87818     | 0.90933                        | 0.093183977 |
| COL14A1   | 1.8184      | 0.86267                        | 0.193348989 |
| HAS1      | 1.81001     | 0.856                          | 0.161273807 |
| ITGB2     | 1.73628     | 0.796                          | 0.065568816 |
| CNTN1     | 1.33537     | 0.41724                        | 0.74611282  |
| LAMC1     | 1.3189      | 0.39933                        | 0.077448261 |
| ITGA3     | 1.2249      | 0.29267                        | 0.178828501 |
| COL15A1   | 1.22208     | 0.28933                        | 0.494216052 |
| LAMA1     | 1.19141     | 0.25267                        | 0.325136324 |
| SPG7      | 1.14817     | 0.19933                        | 0.236638687 |
| LAMB3     | 1.14552     | 0.196                          | 0.220579793 |
| MMP2      | 1.12714     | 0.17267                        | 0.316459708 |
| ADAMTS13  | 1.1014      | 0.13933                        | 0.65407496  |
| ITGB4     | 1.07128     | 0.09933                        | 0.851345374 |
| TIMP2     | 1.04681     | 0.066                          | 0.618822849 |
| CLEC3B    | -1.02859    | -0.04067                       | 0.927906177 |
| CTGF      | -1.04295    | -0.06067                       | 0.908036156 |
| CD44      | -1.09227    | -0.12733                       | 0.694468932 |
| ITGB3     | -1.10496    | -0.144                         | 0.243536447 |
| THBS3     | -1.23456    | -0.304                         | 0.296824826 |
| ITGB5     | -1.29894    | -0.37733                       | 0.052672956 |
| LAMA2     | -1.50943    | -0.594                         | 0.06441316  |
| MMP3      | -1.67095    | -0.74067                       | 0.494898502 |
| SELP      | -1.82626    | -0.86889                       | 0.285453831 |
| COL1A1    | -3.08228    | -1.624                         | 0.081759144 |
| ITGAM     | -11.086     | -3.47067                       | 0.229023125 |
| CDH1      | -15.04765   | -3.91147                       | 0.322237586 |
| MMP8      | -18.21851   | -4.18733                       | 0.054847078 |
| SELE      | -102.31362  | -6.67685                       | 0.631840876 |

(\*) Bold and underlined data entries represent genes that were both significantly up or down regulated (as indicated by their sign) and over 5-fold regulation in either direction, and were therefore used for the GeneAnalytics analyses. (\*\*) Green color represents statistically significant changes, yellow—nonsignificant changes based on Tukey's post hoc correction, but still of  $p < 0.05$ . Pink— nonsignificant changes ( $p > 0.05$  per individual t-test).

**Supplementary Table S3: Statistical analyses of differential gene expression in double normalized coculture vs. HUVECs comparison (correlating to Fig. 7c)**

| Gene name*     | Fold change       | Log <sub>2</sub> (Fold Change) | p-value**          |
|----------------|-------------------|--------------------------------|--------------------|
| <u>VCAN</u>    | <u>1269.46068</u> | <u>10.31</u>                   | <u>0.000395697</u> |
| <u>TNC</u>     | <u>1227.09837</u> | <u>10.26104</u>                | <u>0.000008465</u> |
| <u>SPP1</u>    | <u>688.66193</u>  | <u>9.42765</u>                 | <u>0.000087147</u> |
| <u>TGFBI</u>   | <u>610.28247</u>  | <u>9.25333</u>                 | <u>0.000002521</u> |
| <u>THBS2</u>   | <u>344.09585</u>  | <u>8.42667</u>                 | <u>0.000006996</u> |
| <u>COL6A2</u>  | <u>288.6812</u>   | <u>8.17333</u>                 | <u>0.0000053</u>   |
| <u>MMP13</u>   | <u>153.76638</u>  | <u>7.2646</u>                  | <u>0.000244949</u> |
| <u>COL7A1</u>  | <u>143.01275</u>  | <u>7.16</u>                    | <u>0.000003834</u> |
| <u>LAMA1</u>   | <u>92.1982</u>    | <u>6.52667</u>                 | <u>0.000581362</u> |
| <u>ITGB2</u>   | <u>77.17936</u>   | <u>6.27014</u>                 | <u>0.00006721</u>  |
| <u>CD44</u>    | <u>71.34135</u>   | <u>6.15667</u>                 | <u>0.000047536</u> |
| <u>HAS1</u>    | <u>57.41411</u>   | <u>5.84333</u>                 | <u>0.000425501</u> |
| <u>TIMP1</u>   | <u>37.70455</u>   | <u>5.23667</u>                 | <u>0.000001191</u> |
| <u>COL6A1</u>  | <u>36.84338</u>   | <u>5.20333</u>                 | <u>0.000031022</u> |
| <u>NCAM1</u>   | <u>20.8357</u>    | <u>4.38099</u>                 | <u>0.000024252</u> |
| <u>COL16A1</u> | <u>13.29981</u>   | <u>3.73333</u>                 | <u>0.0000978</u>   |
| <u>ITGB5</u>   | <u>7.81728</u>    | <u>2.96667</u>                 | <u>0.000513978</u> |
| <u>COL12A1</u> | <u>7.22668</u>    | <u>2.85333</u>                 | <u>0.00033063</u>  |
| <u>MMP14</u>   | <u>7.09433</u>    | <u>2.82667</u>                 | <u>0.000104127</u> |
| MMP2           | 3.83706           | 1.94                           | 0.000141013        |
| ADAMTS13       | 2.82843           | 1.5                            | 0.000562562        |
| ITGA5          | 2.20891           | 1.14333                        | 0.000020879        |
| <u>VCAM1</u>   | <u>-6.60397</u>   | <u>-2.72333</u>                | <u>0.000328755</u> |
| <u>SELP</u>    | <u>-82.4183</u>   | <u>-6.36489</u>                | <u>0.00028728</u>  |
| MMP3           | 300.94026         | 8.23333                        | 0.002213204        |
| COL1A1         | 88.64701          | 6.47                           | 0.000802218        |
| ITGA7          | 30.13427          | 4.91333                        | 0.001494881        |
| COL15A1        | 22.99636          | 4.52333                        | 0.006760226        |
| TIMP3          | 18.42169          | 4.20333                        | 0.001196766        |
| LAMA3          | 13.8326           | 3.79                           | 0.003563509        |
| ITGA4          | 10.9536           | 3.45333                        | 0.002511754        |
| COL14A1        | 7.17676           | 2.84333                        | 0.009633272        |
| ECM1           | 5.70938           | 2.51333                        | 0.001372235        |
| CNTN1          | 4.90232           | 2.29346                        | 0.001036817        |
| MMP11          | 3.57184           | 1.83667                        | 0.039235388        |
| FN1            | 3.05958           | 1.61333                        | 0.009284282        |
| ITGB3          | 2.85469           | 1.51333                        | 0.003172029        |
| LAMA2          | 2.74473           | 1.45667                        | 0.004346804        |
| ITGA3          | 2.52567           | 1.33667                        | 0.002457524        |
| COL5A1         | 2.22942           | 1.15667                        | 0.002098263        |
| ITGA1          | 2.05623           | 1.04                           | 0.028512662        |
| TIMP2          | 1.6358            | 0.71                           | 0.000739673        |
| LAMB1          | 1.60956           | 0.68667                        | 0.010185237        |
| ITGB1          | 1.60585           | 0.68333                        | 0.045404172        |



Table 3 - continued

| Gene name | Fold change | Log <sub>2</sub> (Fold Change) | p-value     |
|-----------|-------------|--------------------------------|-------------|
| LAMC1     | 1.41748     | 0.50333                        | 0.038676458 |
| COL4A2    | -1.24258    | -0.31333                       | 0.042898396 |
| CTNND1    | -1.58008    | -0.66                          | 0.013049036 |
| SPARC     | -2.19872    | -1.13667                       | 0.015887984 |
| ITGA6     | -2.46798    | -1.30333                       | 0.022627362 |
| MMP16     | -2.57279    | -1.36333                       | 0.003144992 |
| MMP1      | -2.58471    | -1.37                          | 0.017779345 |
| CLEC3B    | -2.71321    | -1.44                          | 0.044475744 |
| THBS1     | -3.8282     | -1.93667                       | 0.032569121 |
| COL8A1    | -5.20537    | -2.38                          | 0.009459329 |
| SELE      | -7.19336    | -2.84667                       | 0.004893118 |
| CTGF      | -10.14948   | -3.34333                       | 0.016327219 |
| ITGB4     | -15.34823   | -3.94                          | 0.003226093 |
| SELL      | -23.10287   | -4.53                          | 0.004678186 |
| ADAMTS8   | 91.35003    | 6.51333                        | 0.082350392 |
| MMP9      | 33.28192    | 5.05667                        | 0.054340947 |
| CTNND2    | 24.62162    | 4.62185                        | 0.14025827  |
| MMP8      | 8.18699     | 3.03333                        | 0.116029701 |
| CDH1      | 2.95652     | 1.5639                         | 0.348014713 |
| MMP7      | 2.8219      | 1.49667                        | 0.110427942 |
| COL11A1   | 2.6492      | 1.40556                        | 0.20303527  |
| VTN       | 2.54324     | 1.34667                        | 0.123107512 |
| ITGA8     | 2.45094     | 1.29333                        | 0.226653411 |
| MMP12     | 2.10429     | 1.07333                        | 0.338037028 |
| ANOS1     | 1.60214     | 0.68                           | 0.341195565 |
| ADAMTS1   | 1.38831     | 0.47333                        | 0.661855504 |
| MMP15     | 1.12766     | 0.17333                        | 0.678305378 |
| CTNNB1    | 1.12246     | 0.16667                        | 0.354649307 |
| THBS3     | 1.11987     | 0.16333                        | 0.612377847 |
| SPG7      | -1.09936    | -0.13667                       | 0.258815078 |
| ITGA2     | -1.13288    | -0.18                          | 0.272496613 |
| CTNNA1    | -1.14076    | -0.19                          | 0.154977688 |
| PECAM1    | -1.18646    | -0.24667                       | 0.432564358 |
| ITGAM     | -1.33793    | -0.42                          | 0.915618072 |
| SGCE      | -1.35035    | -0.43333                       | 0.071895509 |
| ITGAV     | -1.36289    | -0.44667                       | 0.173621809 |
| ICAM1     | -1.4811     | -0.56667                       | 0.196829407 |
| MMP10     | -2.21914    | -1.15                          | 0.116255476 |
| LAMB3     | -2.37293    | -1.24667                       | 0.119800291 |
| ITGAL     | -15.10199   | -3.91667                       | 0.122694148 |

(\*) Bold and underlined data entries represent genes that were both significantly up or down regulated (as indicated by their sign) and over 5-fold regulation in either direction, and were therefore used for the GeneAnalytics analyses. (\*\*) Green color represents statistically significant changes, yellow—nonsignificant changes based on Tukey's post hoc correction, but still of  $p < 0.05$ . Pink— nonsignificant changes ( $p > 0.05$  per individual t-test).
